# Supplementary material
Source: PubMed Central journal article supplement (PMC8265347)
Supplement: ONCO-26-562-s001.pdf [file ONCO-26-562-s001.pdf]

Supplemental Tables for:

Patient-reported outcomes predict progression-free survival of patients with advanced breast cancer treated with abemaciclib

Sarah Badaoui et al.

**Table S1: Summary of patient characteristics by study**

|                                                       | MONARCH<br>1<br>No. 132 | MONARCH<br>2<br>No. 669 | MONARCH<br>3<br>No. 493 | P-value |
|-------------------------------------------------------|-------------------------|-------------------------|-------------------------|---------|
| <b>Actual treatment received</b>                      |                         |                         |                         | < 0.001 |
| Abemaciclib-150mg + Fulvestrant                       | 0 (0%)                  | 320 (48%)               | 0 (0%)                  |         |
| Abemaciclib-150mg + NSAI                              | 0 (0%)                  | 0 (0%)                  | 327 (66%)               |         |
| Abemaciclib-200mg                                     | 132<br>(100%)           | 0 (0%)                  | 0 (0%)                  |         |
| Abemaciclib-200mg + Fulvestrant                       | 0 (0%)                  | 121 (18%)               | 0 (0%)                  |         |
| Fulvestrant-500mg                                     | 0 (0%)                  | 223 (33%)               | 0 (0%)                  |         |
| NSAI                                                  | 0 (0%)                  | 0 (0%)                  | 161 (33%)               |         |
| Missing                                               | 0 (0%)                  | 5 (1%)                  | 5 (1%)                  |         |
| <b>Randomised study arm</b>                           |                         |                         |                         | < 0.001 |
| Abemaciclib-150mg + Fulvestrant                       | 0 (0%)                  | 325 (49%)               | 0 (0%)                  |         |
| Abemaciclib-150mg + NSAI                              | 0 (0%)                  | 0 (0%)                  | 328 (67%)               |         |
| Abemaciclib-200mg                                     | 132<br>(100%)           | 0 (0%)                  | 0 (0%)                  |         |
| Abemaciclib-200mg + Fulvestrant                       | 0 (0%)                  | 121 (18%)               | 0 (0%)                  |         |
| Placebo + Fulvestrant                                 | 0 (0%)                  | 223 (33%)               | 0 (0%)                  |         |
| Placebo + NSAI                                        | 0 (0%)                  | 0 (0%)                  | 165 (33%)               |         |
| Sex: Female                                           | 132<br>(100%)           | 669 (100%)              | 493 (100%)              |         |
| Age (years)                                           | 58 (53 -<br>67)         | 60 (51 - 68)            | 63 (56 - 70)            | < 0.001 |
| <b>ECOG-PS</b>                                        |                         |                         |                         | 0.6     |
| 0                                                     | 73 (55%)                | 400 (60%)               | 296 (60%)               |         |
| 1+                                                    | 59 (45%)                | 264 (39%)               | 197 (40%)               |         |
| Missing                                               | 0 (0%)                  | 5 (1%)                  | 0 (0%)                  |         |
| <b>Histological tumour grade at initial diagnosis</b> |                         |                         |                         | 0.003   |
| Low/intermediate                                      | 73 (55%)                | 339 (51%)               | 269 (55%)               |         |
| High                                                  | 34 (26%)                | 153 (23%)               | 76 (15%)                |         |
| Unassessable/missing                                  | 25 (19%)                | 177 (26%)               | 148 (30%)               |         |
| Liver tumour site                                     | 93 (70%)                | 176 (26%)               | 78 (16%)                | < 0.001 |
| Bone only disease                                     | 1 (1%)                  | 170 (25%)               | 93 (19%)                | < 0.001 |
| <b>Progesterone Receptor Status</b>                   |                         |                         |                         | 0.4     |
| Positive                                              | 95 (72%)                | 510 (76%)               | 382 (77%)               |         |
| Negative                                              | 35 (27%)                | 140 (21%)               | 106 (22%)               |         |
| Missing                                               | 2 (2%)                  | 19 (3%)                 | 5 (1%)                  |         |

Data are median (IQR) or number of patients (%). P values per Chi-Square test for categorical data and Kruskal-Wallis test for continuous data. NSAI = non-steroidal aromatase inhibitor, ECOG-PS = Eastern Cooperative Oncology Group Performance Status, IQR = interquartile range

Supplemental Tables for:

Patient-reported outcomes predict progression-free survival of patients with advanced breast cancer treated with abemaciclib

Sarah Badaoui et al.

**Table S2: Summary of pre-treatment patient-reported outcome values by study**

|                      | Reference Value*   | MONARCH 1      | MONARCH 2      | MONARCH 3     | P-value |
|----------------------|--------------------|----------------|----------------|---------------|---------|
|                      | No. 1,147          | No. 132        | No. 669        | No. 493       |         |
| Global health status |                    |                |                |               | 0.1     |
| Median (IQR)         | 66.7 (50 - 83.3)   | 67 (50 - 83)   | 67 (50 - 83)   | 67 (50 - 83)  |         |
| Missing              |                    | 1 (1%)         | 19 (3%)        | 18 (4%)       |         |
| Physical function    |                    |                |                |               | 0.08    |
| Median (IQR)         | 86.7 (73.3 - 93.3) | 80 (67 - 93)   | 80 (67 - 93)   | 80 (60 - 93)  |         |
| Missing              |                    | 1 (1%)         | 18 (3%)        | 19 (4%)       |         |
| Role function        |                    |                |                |               | 0.5     |
| Median (IQR)         | 66.7 (50 - 100)    | 83 (67 - 100)  | 83 (67 - 100)  | 83 (67 - 100) |         |
| Missing              |                    | 1 (1%)         | 18 (3%)        | 19 (4%)       |         |
| Emotional function   |                    |                |                |               | 0.03    |
| Median (IQR)         | 66.7 (50 - 83.3)   | 83 (67 - 92)   | 75 (58 - 92)   | 75 (58 - 92)  |         |
| Missing              |                    | 1 (1%)         | 19 (3%)        | 19 (4%)       |         |
| Cognitive function   |                    |                |                |               | 0.3     |
| Median (IQR)         | 83.3 (66.7 - 100)  | 83 (67 - 100)  | 83 (67 - 100)  | 83 (83 - 100) |         |
| Missing              |                    | 1 (1%)         | 19 (3%)        | 20 (4%)       |         |
| Social function      |                    |                |                |               | 0.8     |
| Median (IQR)         | 83.3 (67 - 100)    | 100 (67 - 100) | 100 (67 - 100) | 83 (67 - 100) |         |
| Missing              |                    | 1 (1%)         | 18 (3%)        | 23 (5%)       |         |
| Fatigue              |                    |                |                |               | 0.1     |
| Median (IQR)         | 33.3 (11.1 - 55.6) | 33 (11 - 44)   | 33 (11 - 44)   | 33 (22 - 44)  |         |
| Missing              |                    | 1 (1%)         | 19 (3%)        | 21 (4%)       |         |
| Nausea and vomiting  |                    |                |                |               | 0.41    |
| Median (IQR)         | 0 (0 - 16.7)       | 0 (0 - 0)      | 0 (0 - 0)      | 0 (0 - 2)     |         |
| Missing              |                    | 1 (1%)         | 19 (3%)        | 19 (4%)       |         |
| Pain                 |                    |                |                |               | 0.4     |
| Median (IQR)         | 33.3 (0 - 50)      | 33 (17 - 50)   | 17 (0 - 50)    | 33 (17 - 50)  |         |
| Missing              |                    | 1 (1%)         | 18 (3%)        | 19 (4%)       |         |
| Dyspnoea             |                    |                |                |               | 0.3     |
| Median (IQR)         | 0 (0 - 16.7)       | 0 (0 - 33)     | 0 (0 - 33)     | 0 (0 - 33)    |         |
| Missing              |                    | 1 (1%)         | 20 (3%)        | 22 (4%)       |         |
| Insomnia             |                    |                |                |               | 0.8     |

Supplemental Tables for:

Patient-reported outcomes predict progression-free survival of patients with advanced breast cancer treated with abemaciclib

Sarah Badaoui et al.

|                        |                 |             |             |             |      |
|------------------------|-----------------|-------------|-------------|-------------|------|
| Median (IQR)           | 33.3 (0 - 66.7) | 33 (0 - 33) | 33 (0 - 33) | 33 (0 - 33) |      |
| Missing                |                 | 1 (1%)      | 18 (3%)     | 20 (4%)     |      |
| Appetite loss          |                 |             |             |             | 0.07 |
| Median (IQR)           | 0 (0 - 33.3)    | 0 (0 - 33)  | 0 (0 - 33)  | 0 (0 - 33)  |      |
| Missing                |                 | 1 (1%)      | 19 (3%)     | 20 (4%)     |      |
| Constipation           |                 |             |             |             | 0.1  |
| Median (IQR)           | 0 (0 - 33.3)    | 0 (0 - 33)  | 0 (0 - 33)  | 0 (0 - 33)  |      |
| Missing                |                 | 1 (1%)      | 19 (3%)     | 19 (4%)     |      |
| Diarrhoea              |                 |             |             |             | 0.6  |
| Median (IQR)           | 0 (0 - 0)       | 0 (0 - 0)   | 0 (0 - 0)   | 0 (0 - 0)   |      |
| Missing                |                 | 1 (1%)      | 19 (3%)     | 20 (4%)     |      |
| Financial difficulties |                 |             |             |             | 0.6  |
| Median (IQR)           | 0 (0 - 33.3)    | 0 (0 - 33)  | 0 (0 - 33)  | 0 (0 - 33)  |      |
| Missing                |                 | 1 (1%)      | 19 (3%)     | 24 (5%)     |      |

Data are median (IQR) or number of patients (%). P values per Chi-Square test for categorical data and Kruskal-Wallis test for continuous data.

\* Reference value according to EORTC QLQ-C30 Tables of Reference Values for Breast Cancer: recurrent/metastatic (p. 70)

Supplemental Tables for:

Patient-reported outcomes predict progression-free survival of patients with advanced breast cancer treated with abemaciclib

Sarah Badaoui et al.

**Table S3: Univariable and multivariable association between PROs and PFS for patients treated with abemaciclib**

| PRO                    | Univariable |      |              |        |      | Adjusted <sup>#</sup> |      |              |       |
|------------------------|-------------|------|--------------|--------|------|-----------------------|------|--------------|-------|
|                        | n           | HR*  | 95% CI       | P      | c    | n                     | HR*  | 95% CI       | P     |
| Physical function      | 878         | 0.92 | 0.88 to 0.96 | <0.001 | 0.55 | 864                   | 0.92 | 0.88 to 0.97 | 0.001 |
| Pain                   | 878         | 1.05 | 1.02 to 1.09 | 0.003  | 0.54 | 864                   | 1.05 | 1.01 to 1.09 | 0.009 |
| Role function          | 879         | 0.95 | 0.92 to 0.98 | 0.002  | 0.54 | 865                   | 0.96 | 0.92 to 0.99 | 0.01  |
| Global Health Status   | 878         | 0.96 | 0.92 to 1.00 | 0.06   | 0.53 | 864                   | 0.98 | 0.94 to 1.02 | 0.3   |
| Fatigue                | 877         | 1.06 | 1.02 to 1.10 | 0.003  | 0.53 | 863                   | 1.04 | 1.00 to 1.09 | 0.04  |
| Appetite loss          | 878         | 1.05 | 1.02 to 1.09 | 0.004  | 0.53 | 864                   | 1.04 | 1.01 to 1.08 | 0.03  |
| Nausea and vomiting    | 878         | 1.07 | 1.01 to 1.13 | 0.01   | 0.53 | 864                   | 1.04 | 0.98 to 1.10 | 0.2   |
| Insomnia               | 877         | 1.03 | 1.00 to 1.07 | 0.04   | 0.52 | 863                   | 1.03 | 1.00 to 1.06 | 0.09  |
| Constipation           | 877         | 1.03 | 1.00 to 1.07 | 0.09   | 0.52 | 863                   | 1.03 | 0.99 to 1.07 | 0.1   |
| Emotional function     | 878         | 0.99 | 0.95 to 1.03 | 0.5    | 0.52 | 864                   | 0.99 | 0.95 to 1.04 | 0.7   |
| Dyspnoea               | 876         | 1.03 | 0.99 to 1.07 | 0.1    | 0.52 | 862                   | 1.02 | 0.98 to 1.06 | 0.3   |
| Financial difficulties | 875         | 1.01 | 0.98 to 1.04 | 0.6    | 0.52 | 861                   | 1.01 | 0.98 to 1.04 | 0.5   |
| Diarrhoea              | 876         | 0.96 | 0.91 to 1.02 | 0.2    | 0.52 | 862                   | 0.96 | 0.91 to 1.01 | 0.1   |
| Social function        | 875         | 0.98 | 0.95 to 1.02 | 0.3    | 0.51 | 861                   | 0.99 | 0.95 to 1.03 | 0.6   |
| Cognitive function     | 877         | 0.97 | 0.92 to 1.01 | 0.2    | 0.51 | 863                   | 0.97 | 0.93 to 1.02 | 0.3   |

CI=confidence interval, HR=hazard ratio

\*HR based on 10-unit increase

<sup>#</sup>Adjusted for ECOG-PS, bone only disease, liver tumour site, progesterone receptor status and histological tumour grade at initial diagnosis

Supplemental Tables for:

Patient-reported outcomes predict progression-free survival of patients with advanced breast cancer treated with abemaciclib

Sarah Badaoui et al.

**Table S4: Univariable association between patient-reported physical function, pain and role function with PFS for patients treated with abemaciclib by study**

|                   | MONARCH 1 |      |              |     |      | MONARCH 2 |      |              |        |      | MONARCH 3 |      |              |     |      | <i>P[interaction]</i> |
|-------------------|-----------|------|--------------|-----|------|-----------|------|--------------|--------|------|-----------|------|--------------|-----|------|-----------------------|
|                   | n         | HR*  | 95% CI       | P   | c    | n         | HR*  | 95% CI       | P      | c    | n         | HR*  | 95% CI       | P   | c    |                       |
| Physical function | 131       | 0.96 | 0.87 to 1.07 | 0.5 | 0.53 | 431       | 0.88 | 0.82 to 0.93 | <0.001 | 0.58 | 316       | 0.96 | 0.88 to 1.04 | 0.3 | 0.53 | 0.1                   |
| Pain              | 131       | 1.03 | 0.95 to 1.12 | 0.5 | 0.52 | 431       | 1.06 | 1.01 to 1.11 | 0.01   | 0.55 | 316       | 1.05 | 0.98 to 1.11 | 0.2 | 0.54 | >0.9                  |
| Role function     | 131       | 0.96 | 0.89 to 1.04 | 0.3 | 0.54 | 431       | 0.93 | 0.89 to 0.98 | 0.002  | 0.55 | 317       | 0.97 | 0.91 to 1.03 | 0.3 | 0.52 | 0.7                   |

CI=confidence interval, HR=hazard ratio

\*HR based on 10-unit increase

Supplemental Tables for:

Patient-reported outcomes predict progression-free survival of patients with advanced breast cancer treated with abemaciclib

Sarah Badaoui et al.

**Table S5: Univariable and multivariable association between patient-reported physical function, role function and pain, with PFS for patients treated with the comparator arms of MONARCH 2 and 3**

| PRO               | Univariable |      |              |     |      | Multivariable <sup>#</sup> |      |              |     |
|-------------------|-------------|------|--------------|-----|------|----------------------------|------|--------------|-----|
|                   | n           | HR*  | 95% CI       | P   | c    | n                          | HR*  | 95% CI       | P   |
| Physical function | 377         | 1.01 | 0.95 to 1.07 | 0.8 | 0.47 | 369                        | 1.03 | 0.96 to 1.10 | 0.4 |
| Role function     | 376         | 1.01 | 0.97 to 1.06 | 0.6 | 0.5  | 369                        | 0.98 | 0.93 to 1.03 | 0.5 |
| Pain              | 377         | 1    | 0.95 to 1.04 | 0.9 | 0.47 | 368                        | 1.03 | 0.98 to 1.09 | 0.2 |

CI=confidence interval, HR=hazard ratio

\*HR based on 10-unit increase

<sup>#</sup>Adjusted for ECOG-PS, bone only disease, liver tumour site, progesterone receptor status and histological tumour grade at initial diagnosis

Supplemental Tables for:

Patient-reported outcomes predict progression-free survival of patients with advanced breast cancer treated with abemaciclib

Sarah Badaoui et al.

**Table S6: Univariable and multivariable association between patient-reported physical function, role function and pain, with OS for patients treated with abemaciclib**

| PRO               | Univariable |     |              |       |     | Multivariable <sup>#</sup> |     |              |       |     |
|-------------------|-------------|-----|--------------|-------|-----|----------------------------|-----|--------------|-------|-----|
|                   | n           | HR* | 95% CI       | P     | c   | n                          | HR* | 95% CI       | P     | c   |
| Physical function | 87          | 0.8 | 0.80 to 0.90 | <0.00 | 0.6 | 86                         | 0.8 | 0.81 to 0.93 | <0.00 | 0.6 |
|                   | 8           | 5   |              | 1     | 0   | 4                          | 7   |              | 1     | 5   |
| Role function     | 87          | 0.9 | 0.86 to 0.94 | <0.00 | 0.5 | 86                         | 0.9 | 0.87 to 0.96 | <0.00 | 0.6 |
|                   | 9           | 0   |              | 1     | 7   | 5                          | 1   |              | 1     | 4   |
| Pain              | 87          | 1.0 | 1.03 to 1.14 | 0.001 | 0.5 | 86                         | 1.0 | 1.01 to 1.13 | 0.02  | 0.6 |
|                   | 8           | 8   |              |       | 7   | 4                          | 7   |              |       | 4   |

CI=confidence interval, HR=hazard ratio

\*HR based on 10-unit increase

<sup>#</sup>Adjusted for ECOG-PS, bone only disease, liver tumour site, progesterone receptor status and histological tumour grade at initial diagnosis

Supplemental Tables for:

Patient-reported outcomes predict progression-free survival of patients with advanced breast cancer treated with abemaciclib

Sarah Badaoui et al.

**Table S7: Summary of patient characteristics by patient-reported physical function**

|                                                       | <73.3<br>No. 407 | ≥73.3 to 93.3<br>No. 475 | ≥ 93.3<br>No. 374 | P-value |
|-------------------------------------------------------|------------------|--------------------------|-------------------|---------|
| <b>Actual treatment received</b>                      |                  |                          |                   | 0.057   |
| Abemaciclib-150mg + Fulvestrant                       | 98 (24%)         | 121 (25%)                | 94 (25%)          |         |
| Abemaciclib-150mg + NSAI                              | 108 (27%)        | 110 (23%)                | 98 (26%)          |         |
| Abemaciclib-200mg                                     | 44 (11%)         | 53 (11%)                 | 34 (9%)           |         |
| Abemaciclib-200mg + Fulvestrant                       | 29 (7%)          | 54 (11%)                 | 35 (9%)           |         |
| Fulvestrant                                           | 59 (14%)         | 87 (18%)                 | 73 (20%)          |         |
| NSAI                                                  | 68 (17%)         | 50 (11%)                 | 40 (11%)          |         |
| Missing                                               | 1 (<1%)          | 0 (0%)                   | 0 (0%)            |         |
| <b>Study</b>                                          |                  |                          |                   | 0.034   |
| MONARCH1                                              | 44 (11%)         | 53 (11%)                 | 34 (9%)           |         |
| MONARCH2                                              | 187 (46%)        | 262 (55%)                | 202 (54%)         |         |
| MONARCH3                                              | 176 (43%)        | 160 (34%)                | 138 (37%)         |         |
| Sex: Female                                           | 407 (100%)       | 475 (100%)               | 374 (100%)        |         |
| Age (years)                                           | 64 (55 - 71)     | 60 (54 - 69)             | 59 (52 - 66)      | < 0.001 |
| <b>ECOG-PS</b>                                        |                  |                          |                   | < 0.001 |
| 0                                                     | 151 (37%)        | 292 (61%)                | 303 (81%)         |         |
| 1+                                                    | 256 (63%)        | 182 (38%)                | 70 (19%)          |         |
| Missing                                               | 0 (0%)           | 1 (<1%)                  | 1 (<1%)           |         |
| <b>Histological tumour grade at initial diagnosis</b> |                  |                          |                   | 0.77    |
| Low/Intermediate                                      | 207 (51%)        | 257 (54%)                | 200 (53%)         |         |
| High                                                  | 86 (21%)         | 88 (19%)                 | 78 (21%)          |         |
| Unassessable/Missing                                  | 114 (28%)        | 130 (27%)                | 96 (26%)          |         |
| Liver tumour site                                     | 104 (26%)        | 134 (28%)                | 98 (26%)          | 0.65    |
| Bone only disease                                     | 96 (24%)         | 91 (19%)                 | 68 (18%)          | 0.13    |
| <b>Progesterone Receptor Status</b>                   |                  |                          |                   | 0.19    |
| Positive                                              | 299 (73%)        | 366 (77%)                | 295 (79%)         |         |
| Negative                                              | 100 (25%)        | 104 (22%)                | 72 (19%)          |         |
| Missing                                               | 8 (2%)           | 5 (1%)                   | 7 (2%)            |         |

Data are median (IQR) or number of patients (%). P values per Chi-Square test for categorical data and Kruskal-Wallis test for continuous data.



Supplemental Tables for:

Patient-reported outcomes predict progression-free survival of patients with advanced breast cancer treated with abemaciclib

Sarah Badaoui et al.

**Table S8: Summary of patient-reported physical function raw scores by physician- assessed ECOG-PS in patients treated with abemaciclib**

|                                                                  | ECOG-PS      |               | P-value |
|------------------------------------------------------------------|--------------|---------------|---------|
|                                                                  | 0<br>No. 528 | 1+<br>No. 370 |         |
| <b>Physical Function at Baseline</b>                             |              |               | < 0.001 |
| Low                                                              | 100 (19%)    | 179 (48%)     |         |
| Intermediate                                                     | 204 (39%)    | 133 (36%)     |         |
| High                                                             | 210 (40%)    | 50 (14%)      |         |
| Missing                                                          | 14 (3%)      | 8 (2%)        |         |
| <b>Trouble with strenuous activity</b>                           |              |               | < 0.001 |
| 1                                                                | 172 (33%)    | 41 (11%)      |         |
| 2                                                                | 203 (38%)    | 128 (35%)     |         |
| 3                                                                | 90 (17%)     | 118 (32%)     |         |
| 4                                                                | 49 (9%)      | 75 (20%)      |         |
| Missing                                                          | 14 (3%)      | 8 (2%)        |         |
| <b>Trouble taking a long walk</b>                                |              |               | < 0.001 |
| 1                                                                | 220 (42%)    | 58 (16%)      |         |
| 2                                                                | 174 (33%)    | 121 (33%)     |         |
| 3                                                                | 89 (17%)     | 111 (30%)     |         |
| 4                                                                | 31 (6%)      | 72 (19%)      |         |
| Missing                                                          | 14 (3%)      | 8 (2%)        |         |
| <b>Trouble taking a short walk</b>                               |              |               | < 0.001 |
| 1                                                                | 411 (78%)    | 190 (51%)     |         |
| 2                                                                | 86 (16%)     | 116 (31%)     |         |
| 3                                                                | 12 (2%)      | 38 (10%)      |         |
| 4                                                                | 4 (1%)       | 16 (4%)       |         |
| Missing                                                          | 15 (3%)      | 10 (3%)       |         |
| <b>Need to stay in bed or a chair</b>                            |              |               | < 0.001 |
| 1                                                                | 357 (68%)    | 148 (40%)     |         |
| 2                                                                | 126 (24%)    | 119 (32%)     |         |
| 3                                                                | 25 (5%)      | 73 (20%)      |         |
| 4                                                                | 4 (1%)       | 20 (5%)       |         |
| Missing                                                          | 16 (3%)      | 10 (3%)       |         |
| <b>Need help with eating, dressing, washing, or using toilet</b> |              |               | < 0.001 |
| 1                                                                | 500 (95%)    | 309 (84%)     |         |
| 2                                                                | 12 (2%)      | 39 (11%)      |         |
| 3                                                                | 1 (<1%)      | 8 (2%)        |         |
| 4                                                                | 0 (0%)       | 7 (2%)        |         |
| Missing                                                          | 15 (3%)      | 7 (2%)        |         |

Data are median (IQR) or number of patients (%). P values per Chi-Square test for categorical data and Kruskal-Wallis test for continuous data.

Low physical function < 73.3

Intermediate physical function 73.3 – 93.3

High physical function ≥93.3

Supplemental Tables for:  
 Patient-reported outcomes predict progression-free survival of patients with advanced breast cancer treated with abemaciclib  
 Sarah Badaoui et al.

**Table S9: Association of pre-treatment patient-reported physical function with PFS for the randomised arms of MONARCH 2.**

| Variable                            | Abemaciclib arm | Comparator arm | HR [95% CI]         | P<br>[interaction] |
|-------------------------------------|-----------------|----------------|---------------------|--------------------|
|                                     | m% [95 CI]      |                |                     |                    |
| <b>MONARCH 2</b>                    |                 |                |                     | 0.1                |
| Low physical function               | 52 [44 to 63]   | 38 [27 to 53]  | 0.72 [0.49 to 1.06] |                    |
| Intermediate/high physical function | 64 [59 to 70]   | 42 [35 to 51]  | 0.51 [0.40 to 0.66] |                    |

m% = probability of PFS within first 12 months  
 CI=confidence interval, HR=hazard ratio  
 Reference = Did not plan to receive abemaciclib treatment  
 Low physical function < 73.3  
 Intermediate/High physical function ≥73.3

Supplemental Tables for:

Patient-reported outcomes predict progression-free survival of patients with advanced breast cancer treated with abemaciclib

Sarah Badaoui et al.

**Table S10: Association of pre-treatment patient-reported physical function with PFS for the randomised arms of MONARCH 3.**

| Variable                            | Abemaciclib arm<br>m% [95 CI] | Comparator arm<br>m% [95 CI] | HR [95% CI]         | P[interaction] |
|-------------------------------------|-------------------------------|------------------------------|---------------------|----------------|
| <b>MONARCH 3</b>                    |                               |                              |                     | 0.03           |
| Low physical function               | 69 [60 to 79]                 | 65 [54 to 78]                | 0.77 [0.51 to 1.17] |                |
| Intermediate/high physical function | 75 [70 to 82]                 | 53 [44 to 65]                | 0.43 [0.31 to 0.60] |                |

m% = probability of PFS within first 12 months  
 CI=confidence interval, HR=hazard ratio  
 Reference = Did not plan to receive abemaciclib treatment  
 Low physical function < 73.3  
 Intermediate/high physical function ≥73.3

Supplemental Tables for:

Patient-reported outcomes predict progression-free survival of patients with advanced breast cancer treated with abemaciclib

Sarah Badaoui et al.
