# Supplementary material
Source: PubMed Central journal article supplement (PMC8265347)
Supplement: ONCO-26-562-s002.pdf [file ONCO-26-562-s002.pdf]

Supplemental Figures for:  
Patient-reported outcomes predict progression-free survival of patients with advanced breast cancer treated with abemaciclib  
Sarah Badaoui et al.

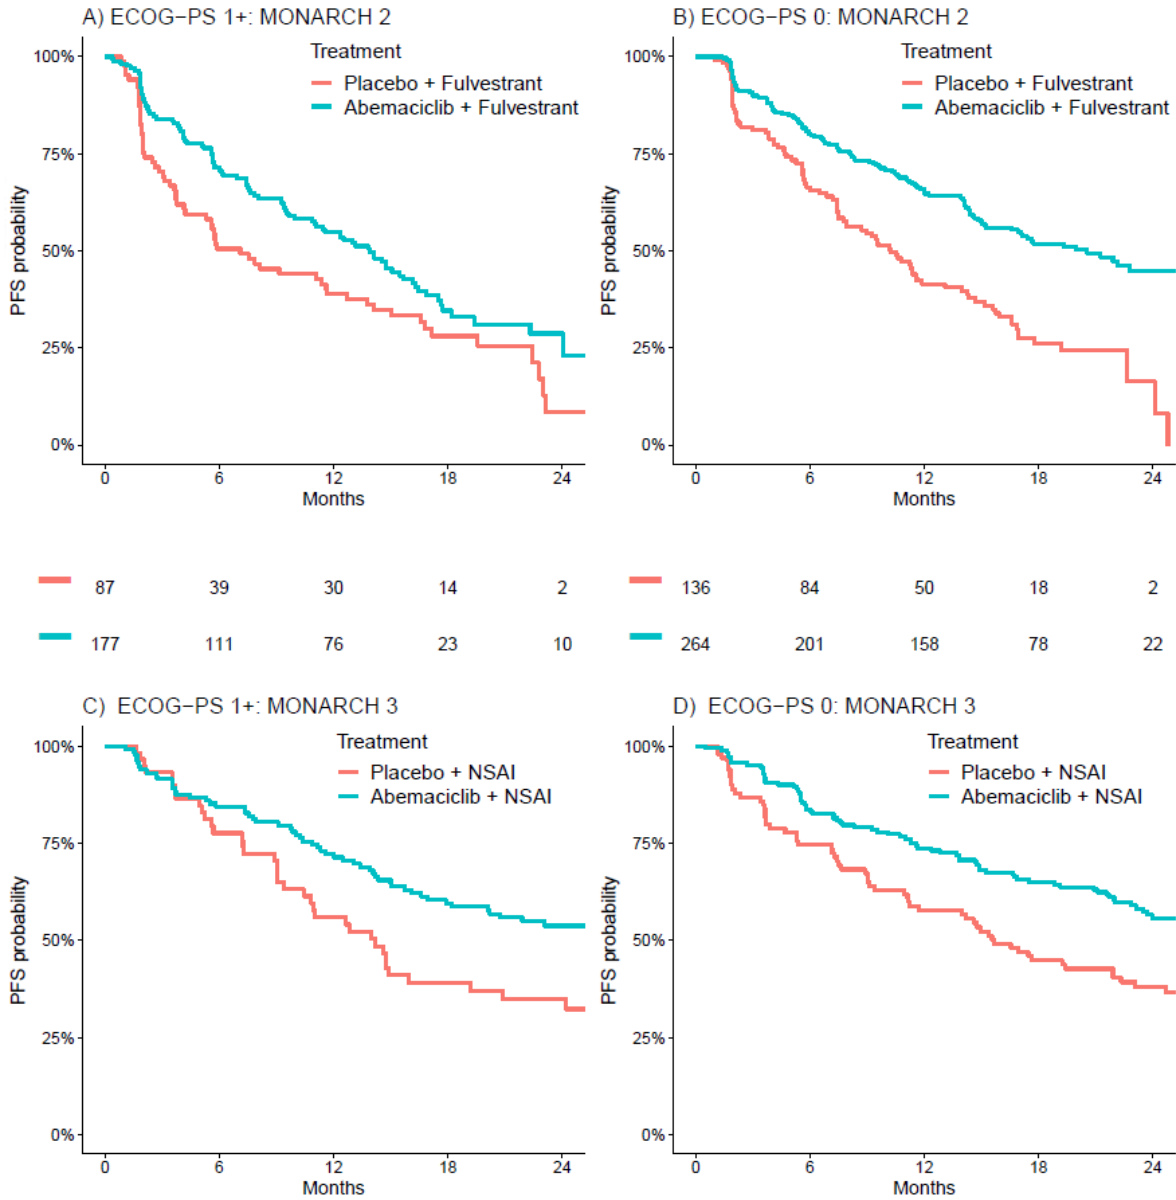

**Figure S1:** Kaplan Meier comparisons of PFS by pre-treatment ECOG-PS for the randomised arms of MONARCH 2 and MONARCH 3 (abemaciclib versus comparator).
